# Supplementary material for: Severe hydroxymethylbilane synthase deficiency causes depression-like behavior and mitochondrial dysfunction in a mouse model of homozygous dominant acute intermittent porphyria
Source: PubMed Central journal article supplement (PMC7082933; doi:10.1186/s40478-020-00910-z), 2020-03-20
Supplement: 40478_2020_910_MOESM1_ESM.pdf [file 40478_2020_910_MOESM1_ESM.pdf]

**Supplementary Table-1.**

| Experiment                              | Figure | Sample size  |          |             |                     |          |             |
|-----------------------------------------|--------|--------------|----------|-------------|---------------------|----------|-------------|
|                                         |        | WT (control) |          |             | KI (HMBS-deficient) |          |             |
|                                         |        | sex          | genotype | condition   | sex                 | genotype | condition   |
| <b>Phenotyper</b>                       | 1A-B   | 6            | 12       | in vivo     | 6                   | 12       | in vivo     |
| <b>SPT</b>                              | 1C     | 11-12        | 23       | in vivo     | 15-19               | 34       | in vivo     |
| <b>NSF</b>                              | 1D     | 11-12        | 23       | in vivo     | 15-19               | 34       | in vivo     |
| <b>TST</b>                              | 1F     | 6-9          | 15       | in vivo     | 13-14               | 27       | in vivo     |
| <b>LD</b>                               | 1G     | 11-12        | 23       | in vivo     | 15-19               | 34       | in vivo     |
| <b>EPM</b>                              | 1H     | 11-12        | 23       | in vivo     | 15-19               | 34       | in vivo     |
| <b>RNAseq</b>                           | 2A-B   | 6 males      | 6        | hippocampus | 6 males             | 6        | hippocampus |
| <b>Myelin IHC</b>                       | 3A-F   | 4-6          | 10       | sections    | 6                   | 12       | sections    |
| <b>Mitochondria enzyme activity</b>     | 4A-D   | 4-6          | 10       | hippocampus | 4-6                 | 10       | hippocampus |
| <b>Mitochondrial membrane potential</b> | 4E-F   |              | 12       | cells       |                     | 9        | cells       |
| <b>Neurogenesis</b>                     | 5A-H   | 6            | 12       | sections    | 6                   | 12       | sections    |
| <b>Electrophysiology</b>                | 6A-E   | 6-7          | 13       | hippocampus | 4                   | 8        | hippocampus |

**Supplementary Table-1.** Description of samples. Samples sizes (with sex and genotype) are reported according to experimental procedure.
