# Supplementary material for: Severe hydroxymethylbilane synthase deficiency causes depression-like behavior and mitochondrial dysfunction in a mouse model of homozygous dominant acute intermittent porphyria
Source: PubMed Central journal article supplement (PMC7082933; doi:10.1186/s40478-020-00910-z), 2020-03-20
Supplement: 40478_2020_910_MOESM2_ESM.pdf [file 40478_2020_910_MOESM2_ESM.pdf]

**Supplementary Table-2.**

| gene_short_name       | locus                     | sample_1 | sample_2 | value_1 | value_2 | fold change | p_value  | q_value |
|-----------------------|---------------------------|----------|----------|---------|---------|-------------|----------|---------|
| Gm23490               | chr7:61704518-61829422    | WT       | KI       | 65,41   | 1,19    | 0,0182      | 5,00E-05 | 0,0042  |
| Pou4f1                | chr14:104461675-104467999 | WT       | KI       | 0,45    | 0,02    | 0,0426      | 5,00E-05 | 0,0042  |
| 2900076A07Rik,Mir1839 | chr7:81523562-81532521    | WT       | KI       | 125,19  | 9,03    | 0,0721      | 5,00E-05 | 0,0042  |
| AC154296.1,Gm25791    | chr9:15314841-15314981    | WT       | KI       | 264,00  | 42,41   | 0,1607      | 5,00E-05 | 0,0042  |
| Gm5741                | chr8:85067567-85067982    | WT       | KI       | 12,88   | 2,09    | 0,1623      | 5,00E-05 | 0,0042  |
| Mir704,Pdia4          | chr6:47796140-47813430    | WT       | KI       | 84,82   | 13,90   | 0,1639      | 5,00E-05 | 0,0042  |
| Dvl2,Mir324           | chr11:70000594-70015408   | WT       | KI       | 45,75   | 8,42    | 0,1841      | 5,00E-05 | 0,0042  |
| Gpr151                | chr18:42578019-42579652   | WT       | KI       | 3,67    | 0,71    | 0,1930      | 5,00E-05 | 0,0042  |
| Irx2                  | chr13:72628819-72634198   | WT       | KI       | 0,94    | 0,19    | 0,2045      | 5,00E-05 | 0,0042  |
| Gm44783               | chr11:88253367-88256990   | WT       | KI       | 0,43    | 0,09    | 0,2161      | 5,00E-05 | 0,0042  |
| Six3                  | chr17:85600650-85629302   | WT       | KI       | 2,39    | 0,56    | 0,2353      | 5,00E-05 | 0,0042  |
| Trh                   | chr6:92242060-92244650    | WT       | KI       | 1,40    | 0,33    | 0,2391      | 5,00E-05 | 0,0042  |
| Epc1,Mir1893          | chr18:6435950-6516108     | WT       | KI       | 41,90   | 11,09   | 0,2647      | 5,00E-05 | 0,0042  |
| Chrn4                 | chr9:55028153-55048779    | WT       | KI       | 0,59    | 0,16    | 0,2764      | 5,00E-05 | 0,0042  |
| Irx1                  | chr13:71957920-71963723   | WT       | KI       | 0,83    | 0,23    | 0,2813      | 5,00E-05 | 0,0042  |
| Lect1                 | chr14:79637689-79662170   | WT       | KI       | 1,75    | 0,54    | 0,3109      | 5,00E-05 | 0,0042  |
| Chrna3                | chr9:55010110-55026562    | WT       | KI       | 0,88    | 0,30    | 0,3376      | 5,00E-05 | 0,0042  |
| A230065H16Rik         | chr12:111406808-111412090 | WT       | KI       | 2,62    | 0,90    | 0,3452      | 5,00E-05 | 0,0042  |
| Capn11                | chr17:45630203-45659325   | WT       | KI       | 1,94    | 0,68    | 0,3502      | 5,00E-05 | 0,0042  |
| Snhg15,Snora9         | chr11:6527898-6528746     | WT       | KI       | 4,18    | 1,59    | 0,3795      | 5,00E-05 | 0,0042  |
| Ctxn3                 | chr18:57468515-57478133   | WT       | KI       | 1,83    | 0,71    | 0,3865      | 5,00E-05 | 0,0042  |
| Lrrc17                | chr5:21483846-21645605    | WT       | KI       | 2,50    | 0,98    | 0,3934      | 5,00E-05 | 0,0042  |
| Zic4                  | chr9:91368969-91389348    | WT       | KI       | 2,54    | 1,00    | 0,3956      | 5,00E-05 | 0,0042  |
| Crocc2                | chr1:93168724-93231072    | WT       | KI       | 0,53    | 0,21    | 0,4007      | 5,00E-05 | 0,0042  |
| Gm43398               | chr5:143357337-143403748  | WT       | KI       | 3,02    | 1,22    | 0,4037      | 5,00E-05 | 0,0042  |
| Wfikkn2               | chr11:94235955-94242707   | WT       | KI       | 1,14    | 0,47    | 0,4087      | 5,00E-05 | 0,0042  |
| Tcf7l2                | chr19:55741809-55933654   | WT       | KI       | 13,08   | 5,36    | 0,4097      | 5,00E-05 | 0,0042  |
| Foxp2                 | chr6:14901348-15441977    | WT       | KI       | 1,05    | 0,43    | 0,4146      | 5,00E-05 | 0,0042  |
| Fxyd2                 | chr9:45399708-45410278    | WT       | KI       | 12,88   | 5,39    | 0,4188      | 5,00E-05 | 0,0042  |
| Zic1                  | chr9:91358057-91365810    | WT       | KI       | 14,69   | 6,18    | 0,4203      | 5,00E-05 | 0,0042  |
| Endou                 | chr15:97711018-97731405   | WT       | KI       | 0,84    | 0,36    | 0,4328      | 5,00E-05 | 0,0042  |
| Cep131,Gm25948        | chr11:120064429-120086827 | WT       | KI       | 40,34   | 17,59   | 0,4361      | 5,00E-05 | 0,0042  |
| Syt9                  | chr7:107370789-107548656  | WT       | KI       | 5,34    | 2,34    | 0,4388      | 5,00E-05 | 0,0042  |
| Tac2                  | chr10:127724477-127731767 | WT       | KI       | 9,23    | 4,06    | 0,4399      | 5,00E-05 | 0,0042  |
| Myoc                  | chr1:162639154-162658219  | WT       | KI       | 3,72    | 1,66    | 0,4474      | 5,00E-05 | 0,0042  |
| Fam19a4               | chr6:96831202-97060413    | WT       | KI       | 1,12    | 0,51    | 0,4537      | 5,00E-05 | 0,0042  |
| C3                    | chr17:57203969-57228136   | WT       | KI       | 0,58    | 0,27    | 0,4548      | 5,00E-05 | 0,0042  |
| Fzd10                 | chr5:128600843-128604093  | WT       | KI       | 0,98    | 0,45    | 0,4550      | 5,00E-05 | 0,0042  |
| Slitrk6               | chr14:110748577-110755149 | WT       | KI       | 1,28    | 0,60    | 0,4661      | 5,00E-05 | 0,0042  |
| Grid2ip               | chr5:143357337-143403748  | WT       | KI       | 2,64    | 1,25    | 0,4726      | 5,00E-05 | 0,0042  |
| Edn1                  | chr13:42301269-42307989   | WT       | KI       | 1,31    | 0,62    | 0,4751      | 5,00E-05 | 0,0042  |
| Apba3,Mir3057         | chr10:81268171-81291267   | WT       | KI       | 44,87   | 21,40   | 0,4769      | 5,00E-05 | 0,0042  |
| Ramp3                 | chr11:6650147-6677475     | WT       | KI       | 22,06   | 10,56   | 0,4786      | 5,00E-05 | 0,0042  |
| Tmem212               | chr3:27866065-27896368    | WT       | KI       | 5,10    | 2,45    | 0,4800      | 5,00E-05 | 0,0042  |
| Rec8                  | chr14:55618036-55625395   | WT       | KI       | 1,66    | 0,81    | 0,4890      | 5,00E-05 | 0,0042  |
| Celsr3,Gm23156        | chr9:108826319-108852969  | WT       | KI       | 174,80  | 87,51   | 0,5006      | 5,00E-05 | 0,0042  |
| Synpo2                | chr3:123076518-123236147  | WT       | KI       | 6,50    | 3,27    | 0,5027      | 5,00E-05 | 0,0042  |
| Col6a3                | chr1:90765922-90843971    | WT       | KI       | 1,05    | 0,53    | 0,5061      | 5,00E-05 | 0,0042  |
| Tnnt1                 | chr7:4504569-4516004      | WT       | KI       | 17,66   | 8,96    | 0,5072      | 5,00E-05 | 0,0042  |
| Col24a1               | chr3:145292471-145552011  | WT       | KI       | 0,56    | 0,28    | 0,5078      | 5,00E-05 | 0,0042  |
| Dnah10                | chr5:124725084-124834308  | WT       | KI       | 0,43    | 0,22    | 0,5108      | 5,00E-05 | 0,0042  |
| Cox6a2                | chr7:128154018-128206387  | WT       | KI       | 11,26   | 5,77    | 0,5126      | 5,00E-05 | 0,0042  |
| Ecel1                 | chr1:87147654-87156521    | WT       | KI       | 1,45    | 0,74    | 0,5137      | 5,00E-05 | 0,0042  |
| Hba-a2                | chr11:32296488-32297298   | WT       | KI       | 41,36   | 21,44   | 0,5184      | 5,00E-05 | 0,0042  |
| Slc17a6               | chr7:51622005-51671119    | WT       | KI       | 14,36   | 7,48    | 0,5207      | 5,00E-05 | 0,0042  |
| Rab37                 | chr11:115091430-115162236 | WT       | KI       | 6,15    | 3,21    | 0,5226      | 5,00E-05 | 0,0042  |
| Gm9825                | chr6:7982540-7983383      | WT       | KI       | 13,18   | 6,97    | 0,5287      | 5,00E-05 | 0,0042  |
| Wnt3                  | chr11:103774149-103817957 | WT       | KI       | 2,27    | 1,20    | 0,5302      | 5,00E-05 | 0,0042  |
| Calb2                 | chr8:110137501-110168210  | WT       | KI       | 43,78   | 23,25   | 0,5311      | 5,00E-05 | 0,0042  |
| Nexn                  | chr3:152236981-152266318  | WT       | KI       | 2,75    | 1,47    | 0,5351      | 5,00E-05 | 0,0042  |
| Gpr4                  | chr7:19212537-19224174    | WT       | KI       | 2,39    | 1,29    | 0,5377      | 5,00E-05 | 0,0042  |
| Wnt9b                 | chr11:103727363-103749821 | WT       | KI       | 0,97    | 0,53    | 0,5427      | 5,00E-05 | 0,0042  |
| Prkcd                 | chr14:30595355-30626210   | WT       | KI       | 48,51   | 26,99   | 0,5563      | 5,00E-05 | 0,0042  |
| Ddhd1,Mir5131         | chr14:45587739-45658143   | WT       | KI       | 34,35   | 19,12   | 0,5566      | 5,00E-05 | 0,0042  |
| Gm15487               | chr6:37806085-37806550    | WT       | KI       | 216,43  | 120,54  | 0,5570      | 5,00E-05 | 0,0042  |

|                  |                           |    |    |        |        |        |          |        |
|------------------|---------------------------|----|----|--------|--------|--------|----------|--------|
| Patj             | chr4:98395790-98719603    | WT | KI | 5,76   | 3,23   | 0,5601 | 5,00E-05 | 0,0042 |
| Zfx3             | chr8:108714643-108961630  | WT | KI | 0,63   | 0,35   | 0,5612 | 5,00E-05 | 0,0042 |
| Frem3            | chr8:80611079-80695356    | WT | KI | 0,63   | 0,35   | 0,5644 | 5,00E-05 | 0,0042 |
| Hcn4             | chr9:58823411-58863175    | WT | KI | 1,51   | 0,85   | 0,5647 | 5,00E-05 | 0,0042 |
| Gm10687          | chr9:44122185-44134485    | WT | KI | 1,06   | 0,60   | 0,5684 | 5,00E-05 | 0,0042 |
| Zic2             | chr14:122475434-122479852 | WT | KI | 9,49   | 5,41   | 0,5703 | 5,00E-05 | 0,0042 |
| Epha8            | chr4:136929418-136956816  | WT | KI | 2,69   | 1,55   | 0,5780 | 5,00E-05 | 0,0042 |
| Syndig1l         | chr12:84677277-84698807   | WT | KI | 4,03   | 2,33   | 0,5789 | 5,00E-05 | 0,0042 |
| Mrvi1            | chr7:110868269-110982461  | WT | KI | 1,20   | 0,70   | 0,5790 | 5,00E-05 | 0,0042 |
| Tnc              | chr4:63959784-64149924    | WT | KI | 1,61   | 0,93   | 0,5798 | 5,00E-05 | 0,0042 |
| Cdhr3            | chr12:33033795-33092875   | WT | KI | 1,36   | 0,79   | 0,5818 | 5,00E-05 | 0,0042 |
| Lef1             | chr3:131109025-131224356  | WT | KI | 4,76   | 2,79   | 0,5868 | 5,00E-05 | 0,0042 |
| Pdzd3            | chr9:44247306-44251471    | WT | KI | 1,18   | 0,70   | 0,5889 | 5,00E-05 | 0,0042 |
| Prkch            | chr12:73584796-73778185   | WT | KI | 1,85   | 1,10   | 0,5964 | 5,00E-05 | 0,0042 |
| Gm27734,Ntan1    | chr16:13819231-13903131   | WT | KI | 35,30  | 21,27  | 0,6025 | 5,00E-05 | 0,0042 |
| Ret              | chr6:118151744-118197718  | WT | KI | 2,21   | 1,34   | 0,6057 | 5,00E-05 | 0,0042 |
| Ak7              | chr12:105705981-105782447 | WT | KI | 1,86   | 1,13   | 0,6074 | 5,00E-05 | 0,0042 |
| Rgs16            | chr1:153740348-153749324  | WT | KI | 8,44   | 5,16   | 0,6116 | 5,00E-05 | 0,0042 |
| Krcc1,Mir8112    | chr6:71213939-71322233    | WT | KI | 13,08  | 8,03   | 0,6135 | 5,00E-05 | 0,0042 |
| Plcb4            | chr2:135741829-136014593  | WT | KI | 10,00  | 6,20   | 0,6199 | 5,00E-05 | 0,0042 |
| Plekgh1          | chr10:3740363-3967303     | WT | KI | 11,75  | 7,38   | 0,6282 | 5,00E-05 | 0,0042 |
| Trpc3            | chr3:36620481-36690167    | WT | KI | 3,63   | 2,29   | 0,6310 | 5,00E-05 | 0,0042 |
| Ano1             | chr7:144588548-144738592  | WT | KI | 1,39   | 0,88   | 0,6344 | 5,00E-05 | 0,0042 |
| Vangl1           | chr3:102153582-102206266  | WT | KI | 1,99   | 1,27   | 0,6388 | 5,00E-05 | 0,0042 |
| Igsf5,Pcp4       | chr16:96361667-96525793   | WT | KI | 311,44 | 199,23 | 0,6397 | 5,00E-05 | 0,0042 |
| Rabggbt,Snord45c | chr3:153907288-153913009  | WT | KI | 148,32 | 96,08  | 0,6478 | 5,00E-05 | 0,0042 |
| Cybrd1           | chr2:71117922-71142926    | WT | KI | 1,56   | 1,01   | 0,6490 | 5,00E-05 | 0,0042 |
| Plekhd1          | chr12:80692590-80724214   | WT | KI | 3,02   | 1,97   | 0,6503 | 5,00E-05 | 0,0042 |
| Mir7044,Rasgef1a | chr6:118011437-118091546  | WT | KI | 145,14 | 94,41  | 0,6505 | 5,00E-05 | 0,0042 |
| Gpr153           | chr4:152274231-152285337  | WT | KI | 5,88   | 3,84   | 0,6540 | 5,00E-05 | 0,0042 |
| Col5a3           | chr9:20770049-20815067    | WT | KI | 1,13   | 0,74   | 0,6542 | 5,00E-05 | 0,0042 |
| Cpne9            | chr6:113282306-113305569  | WT | KI | 14,08  | 9,27   | 0,6587 | 5,00E-05 | 0,0042 |
| Foxj1            | chr11:116330703-116335399 | WT | KI | 6,15   | 4,05   | 0,6592 | 5,00E-05 | 0,0042 |
| Amotl1           | chr9:14541965-14615006    | WT | KI | 7,03   | 4,64   | 0,6595 | 5,00E-05 | 0,0042 |
| Cd93             | chr2:148436639-148443563  | WT | KI | 1,75   | 1,16   | 0,6596 | 5,00E-05 | 0,0042 |
| Mir331,Vezt      | chr10:93961521-94035817   | WT | KI | 18,55  | 12,24  | 0,6598 | 5,00E-05 | 0,0042 |
| Unc13c           | chr9:73479421-73968966    | WT | KI | 3,76   | 2,48   | 0,6602 | 5,00E-05 | 0,0042 |
| Agt              | chr8:124556533-124569706  | WT | KI | 20,68  | 13,72  | 0,6636 | 5,00E-05 | 0,0042 |
| Grm4             | chr17:27422386-27513341   | WT | KI | 7,57   | 5,15   | 0,6803 | 5,00E-05 | 0,0042 |
| Gm27322,Smurf2   | chr11:106820065-106920761 | WT | KI | 14,55  | 10,05  | 0,6906 | 5,00E-05 | 0,0042 |
| Gm29562          | chr9:88827521-88828425    | WT | KI | 29,64  | 20,50  | 0,6915 | 5,00E-05 | 0,0042 |
| Vav3             | chr3:109340652-109685698  | WT | KI | 5,21   | 3,60   | 0,6917 | 5,00E-05 | 0,0042 |
| Txnip            | chr3:96555787-96566801    | WT | KI | 10,71  | 7,51   | 0,7007 | 5,00E-05 | 0,0042 |
| Rnf152           | chr1:105276913-105361630  | WT | KI | 1,77   | 1,24   | 0,7043 | 5,00E-05 | 0,0042 |
| Cacng5           | chr11:107874604-107915055 | WT | KI | 7,18   | 5,12   | 0,7141 | 5,00E-05 | 0,0042 |
| Rora             | chr9:68653785-69388246    | WT | KI | 6,75   | 4,98   | 0,7382 | 5,00E-05 | 0,0042 |
| Slc37a4          | chr9:44396851-44402968    | WT | KI | 15,66  | 11,57  | 0,7389 | 5,00E-05 | 0,0042 |
| Plekhh1          | chr12:79029162-79089670   | WT | KI | 8,57   | 6,42   | 0,7484 | 5,00E-05 | 0,0042 |
| Fxd6             | chr9:45370184-45396159    | WT | KI | 54,38  | 40,97  | 0,7534 | 5,00E-05 | 0,0042 |
| Chrna4           | chr2:181018379-181039305  | WT | KI | 9,59   | 7,24   | 0,7550 | 5,00E-05 | 0,0042 |
| Mog              | chr17:37010742-37023398   | WT | KI | 49,14  | 37,16  | 0,7562 | 5,00E-05 | 0,0042 |
| Ift46            | chr9:44772909-44793447    | WT | KI | 30,44  | 23,02  | 0,7562 | 5,00E-05 | 0,0042 |
| Cit              | chr5:115845643-116008947  | WT | KI | 11,60  | 8,84   | 0,7618 | 5,00E-05 | 0,0042 |
| Ttyh2            | chr11:114675430-114720977 | WT | KI | 16,20  | 12,35  | 0,7624 | 5,00E-05 | 0,0042 |
| Cldn11           | chr3:31149919-31164324    | WT | KI | 95,49  | 72,83  | 0,7628 | 5,00E-05 | 0,0042 |
| Ccdc136,Gm26220  | chr6:29396616-29426994    | WT | KI | 103,45 | 79,10  | 0,7646 | 5,00E-05 | 0,0042 |
| Adamts4          | chr1:171250420-171260637  | WT | KI | 9,98   | 7,64   | 0,7648 | 5,00E-05 | 0,0042 |
| Cacng4           | chr11:107732356-107795982 | WT | KI | 10,88  | 8,34   | 0,7664 | 5,00E-05 | 0,0042 |
| Rims3            | chr4:120854818-120896579  | WT | KI | 18,68  | 14,34  | 0,7677 | 5,00E-05 | 0,0042 |
| Camk2d           | chr3:126596950-126846326  | WT | KI | 12,13  | 9,31   | 0,7680 | 5,00E-05 | 0,0042 |
| Alas1            | chr9:106233454-106249413  | WT | KI | 41,66  | 32,03  | 0,7688 | 5,00E-05 | 0,0042 |
| Mag              | chr7:30899175-30914832    | WT | KI | 117,82 | 90,84  | 0,7710 | 5,00E-05 | 0,0042 |
| Mcam             | chr9:44134561-44142727    | WT | KI | 11,35  | 8,79   | 0,7744 | 5,00E-05 | 0,0042 |
| Elmo1            | chr13:20090618-20606528   | WT | KI | 21,33  | 16,54  | 0,7753 | 5,00E-05 | 0,0042 |
| Cnp              | chr11:100574903-100581728 | WT | KI | 180,33 | 140,03 | 0,7765 | 5,00E-05 | 0,0042 |
| Myrf             | chr19:10208271-10240748   | WT | KI | 19,04  | 14,83  | 0,7793 | 5,00E-05 | 0,0042 |

|                   |                           |    |    |        |        |        |          |        |
|-------------------|---------------------------|----|----|--------|--------|--------|----------|--------|
| Gm23394,Ralgapa1  | chr12:55602928-55821580   | WT | KI | 33,07  | 25,82  | 0,7806 | 5,00E-05 | 0,0042 |
| Plxnb3            | chrX:73757098-73772514    | WT | KI | 7,76   | 6,07   | 0,7827 | 5,00E-05 | 0,0042 |
| Unc5b             | chr10:60762609-60831581   | WT | KI | 9,42   | 7,38   | 0,7830 | 5,00E-05 | 0,0042 |
| Srgap1            | chr10:121780967-122047315 | WT | KI | 4,20   | 3,31   | 0,7862 | 5,00E-05 | 0,0042 |
| Fa2h              | chr8:111345140-111393824  | WT | KI | 20,65  | 16,30  | 0,7897 | 5,00E-05 | 0,0042 |
| Mal               | chr2:127633225-127656695  | WT | KI | 95,44  | 76,32  | 0,7996 | 5,00E-05 | 0,0042 |
| Gng8              | chr7:16891785-16895435    | WT | KI | 5,09   | 1,85   | 0,3641 | 1,00E-04 | 0,0079 |
| Gpr139            | chr7:119140746-119184603  | WT | KI | 0,41   | 0,22   | 0,5353 | 1,00E-04 | 0,0079 |
| Syt15             | chr14:34220045-34230421   | WT | KI | 0,71   | 0,39   | 0,5515 | 1,00E-04 | 0,0079 |
| Frmpp2            | chr14:33471807-33575269   | WT | KI | 0,56   | 0,31   | 0,5567 | 1,00E-04 | 0,0079 |
| Flnc              | chr6:29433275-29461883    | WT | KI | 0,53   | 0,34   | 0,6284 | 1,00E-04 | 0,0079 |
| Mir5113,Tnrc6b    | chr15:80711318-80941086   | WT | KI | 10,81  | 7,37   | 0,6816 | 1,00E-04 | 0,0079 |
| Cntn6             | chr6:104492810-104863406  | WT | KI | 2,84   | 2,01   | 0,7066 | 1,00E-04 | 0,0079 |
| Syt6              | chr3:103575230-103646068  | WT | KI | 2,63   | 1,86   | 0,7079 | 1,00E-04 | 0,0079 |
| Plch1             | chr3:63696233-63899472    | WT | KI | 1,95   | 1,39   | 0,7119 | 1,00E-04 | 0,0079 |
| Vim               | chr2:13573951-13582826    | WT | KI | 27,56  | 21,61  | 0,7842 | 1,00E-04 | 0,0079 |
| Gm45623           | chr13:56752370-56753827   | WT | KI | 1,37   | 0,64   | 0,4697 | 0,00015  | 0,0110 |
| Slc14a2           | chr18:78146939-78209094   | WT | KI | 0,98   | 0,49   | 0,4981 | 0,00015  | 0,0110 |
| Cfap161           | chr7:83774100-83794880    | WT | KI | 1,40   | 0,73   | 0,5201 | 0,00015  | 0,0110 |
| Zic3              | chrX:58030642-58041736    | WT | KI | 1,53   | 0,87   | 0,5662 | 0,00015  | 0,0110 |
| Gpr88             | chr3:116249653-116253503  | WT | KI | 1,24   | 0,72   | 0,5867 | 0,00015  | 0,0110 |
| Rgs22             | chr15:36009478-36140400   | WT | KI | 0,95   | 0,58   | 0,6064 | 0,00015  | 0,0110 |
| Fam179a           | chr17:71673260-71729669   | WT | KI | 1,05   | 0,64   | 0,6136 | 0,00015  | 0,0110 |
| Lrrc55            | chr2:85160777-85196699    | WT | KI | 5,86   | 4,31   | 0,7361 | 0,00015  | 0,0110 |
| Erb3              | chr10:128567522-128589652 | WT | KI | 3,66   | 2,80   | 0,7648 | 0,00015  | 0,0110 |
| Zfp423            | chr8:87661809-87959595    | WT | KI | 6,21   | 4,78   | 0,7692 | 0,00015  | 0,0110 |
| Sema6a            | chr18:47245253-47368868   | WT | KI | 6,96   | 5,36   | 0,7703 | 0,00015  | 0,0110 |
| Pdp1              | chr4:11958183-11966452    | WT | KI | 27,53  | 21,89  | 0,7948 | 0,00015  | 0,0110 |
| Gab1              | chr8:80764437-80881169    | WT | KI | 9,99   | 8,06   | 0,8073 | 0,00015  | 0,0110 |
| Ddr1              | chr17:35681566-35708244   | WT | KI | 35,60  | 28,99  | 0,8144 | 0,00015  | 0,0110 |
| Gsn               | chr2:35256379-35307892    | WT | KI | 34,90  | 28,44  | 0,8149 | 0,00015  | 0,0110 |
| AC125167.1,Col3a1 | chr1:45311537-45349706    | WT | KI | 2,17   | 0,67   | 0,3089 | 2,00E-04 | 0,0142 |
| Plp1              | chrX:136822670-136839733  | WT | KI | 752,96 | 554,42 | 0,7363 | 2,00E-04 | 0,0142 |
| Thbs4             | chr13:92751589-92794818   | WT | KI | 5,03   | 3,75   | 0,7442 | 2,00E-04 | 0,0142 |
| Nes               | chr3:87971092-87980451    | WT | KI | 2,31   | 1,73   | 0,7471 | 2,00E-04 | 0,0142 |
| Dusp26            | chr8:31089470-31097047    | WT | KI | 20,94  | 16,44  | 0,7853 | 2,00E-04 | 0,0142 |
| Hr                | chr14:70553686-70573548   | WT | KI | 5,71   | 4,53   | 0,7932 | 2,00E-04 | 0,0142 |
| Sox10             | chr15:79154912-79164490   | WT | KI | 27,11  | 22,02  | 0,8122 | 2,00E-04 | 0,0142 |
| Mir8115,P2rx7     | chr5:122643910-122691432  | WT | KI | 8,99   | 2,87   | 0,3192 | 0,00025  | 0,0173 |
| Sln               | chr9:53850163-53854560    | WT | KI | 0,53   | 0,18   | 0,3473 | 0,00025  | 0,0173 |
| Ebf3              | chr7:137193672-137314445  | WT | KI | 0,64   | 0,32   | 0,4923 | 0,00025  | 0,0173 |
| Lrrc74b           | chr16:17544464-17561247   | WT | KI | 1,11   | 0,61   | 0,5498 | 0,00025  | 0,0173 |
| Adgrd1            | chr5:129096749-129204599  | WT | KI | 0,72   | 0,45   | 0,6241 | 0,00025  | 0,0173 |
| Gjc2              | chr11:59175567-59183213   | WT | KI | 11,66  | 8,85   | 0,7586 | 0,00025  | 0,0173 |
| RP23-438P19.12    | chr9:122935811-122942819  | WT | KI | 1,29   | 0,50   | 0,3914 | 3,00E-04 | 0,0204 |
| Adamts19          | chr18:58836763-59053678   | WT | KI | 0,43   | 0,22   | 0,5149 | 3,00E-04 | 0,0204 |
| Zfp521            | chr18:13687012-13972733   | WT | KI | 2,29   | 1,69   | 0,7367 | 3,00E-04 | 0,0204 |
| Gm43305           | chr14:54292442-54297343   | WT | KI | 80,36  | 65,07  | 0,8098 | 3,00E-04 | 0,0204 |
| Sntn              | chr14:13670875-13683148   | WT | KI | 0,80   | 0,32   | 0,4040 | 0,00035  | 0,0231 |
| Vipr2             | chr12:116077727-116146261 | WT | KI | 1,24   | 0,78   | 0,6274 | 0,00035  | 0,0231 |
| Mir3062,Pfas      | chr11:68985696-69008460   | WT | KI | 18,39  | 13,35  | 0,7256 | 0,00035  | 0,0231 |
| Slc29a1           | chr17:45585199-45599603   | WT | KI | 15,00  | 11,59  | 0,7725 | 0,00035  | 0,0231 |
| Tprn              | chr2:25262617-25269885    | WT | KI | 9,87   | 7,73   | 0,7829 | 0,00035  | 0,0231 |
| 2610203C20Rik     | chr9:41327259-41615185    | WT | KI | 11,26  | 9,00   | 0,7993 | 0,00035  | 0,0231 |
| Tspan18           | chr2:93201759-93334487    | WT | KI | 9,63   | 7,76   | 0,8060 | 0,00035  | 0,0231 |
| Ugt8a             | chr3:125865270-125938619  | WT | KI | 17,95  | 14,57  | 0,8114 | 0,00035  | 0,0231 |
| Tacr1             | chr6:82402474-82560104    | WT | KI | 0,59   | 0,36   | 0,6011 | 4,00E-04 | 0,0258 |
| Pld5              | chr1:175962305-176275298  | WT | KI | 1,30   | 0,80   | 0,6130 | 4,00E-04 | 0,0258 |
| Fhdc1             | chr3:84442197-84480429    | WT | KI | 1,91   | 1,23   | 0,6441 | 4,00E-04 | 0,0258 |
| Vash2             | chr1:190947645-190979296  | WT | KI | 1,42   | 0,95   | 0,6689 | 4,00E-04 | 0,0258 |
| Ntng1             | chr3:109780039-110144011  | WT | KI | 15,98  | 12,35  | 0,7728 | 4,00E-04 | 0,0258 |
| Ccdc170           | chr10:4482501-4562231     | WT | KI | 0,56   | 0,32   | 0,5615 | 0,00045  | 0,0285 |
| Gjc3              | chr5:137953460-137963098  | WT | KI | 15,83  | 12,87  | 0,8131 | 0,00045  | 0,0285 |
| Cxcl5             | chr5:90759377-90761624    | WT | KI | 0,82   | 0,33   | 0,4010 | 5,00E-04 | 0,0311 |
| Zfp474            | chr18:52615914-52639830   | WT | KI | 0,60   | 0,29   | 0,4863 | 5,00E-04 | 0,0311 |
| Odf3b             | chr15:89377449-89379254   | WT | KI | 2,96   | 1,78   | 0,6017 | 0,00055  | 0,0335 |

|               |                           |    |    |        |        |        |          |        |
|---------------|---------------------------|----|----|--------|--------|--------|----------|--------|
| Tspan2        | chr3:102720230-102772292  | WT | KI | 51,78  | 38,75  | 0,7483 | 0,00055  | 0,0335 |
| Lpar1         | chr4:58435254-58553628    | WT | KI | 12,12  | 9,69   | 0,7990 | 0,00055  | 0,0335 |
| Nrbp2         | chr15:76085594-76090013   | WT | KI | 75,29  | 62,32  | 0,8278 | 0,00055  | 0,0335 |
| Cntn2         | chr1:132511781-132542939  | WT | KI | 27,47  | 22,86  | 0,8322 | 0,00055  | 0,0335 |
| Msh5          | chr17:35028604-35046726   | WT | KI | 0,23   | 0,45   | 1,9266 | 0,00055  | 0,0335 |
| Stoml3        | chr3:53488726-53508502    | WT | KI | 0,78   | 0,41   | 0,5351 | 6,00E-04 | 0,0363 |
| Krt2          | chr15:101810688-101818169 | WT | KI | 1,82   | 2,59   | 1,4228 | 6,00E-04 | 0,0363 |
| Sema4g        | chr19:44989100-45003397   | WT | KI | 9,96   | 8,17   | 0,8206 | 0,00065  | 0,0389 |
| Ptpn4         | chr1:119652466-119837613  | WT | KI | 11,08  | 9,23   | 0,8329 | 0,00065  | 0,0389 |
| Fam216b       | chr14:78070716-78090786   | WT | KI | 1,09   | 0,64   | 0,5892 | 7,00E-04 | 0,0407 |
| Nhlh2         | chr3:102010075-102015492  | WT | KI | 1,54   | 1,00   | 0,6503 | 7,00E-04 | 0,0407 |
| Igsf1         | chrX:49782535-49797749    | WT | KI | 5,90   | 4,30   | 0,7295 | 7,00E-04 | 0,0407 |
| Col27a1       | chr4:63215434-63334991    | WT | KI | 2,35   | 1,80   | 0,7684 | 7,00E-04 | 0,0407 |
| Tmem88b       | chr4:155781590-155785874  | WT | KI | 26,12  | 21,78  | 0,8339 | 7,00E-04 | 0,0407 |
| 1810041L15Rik | chr15:84379202-84447097   | WT | KI | 18,51  | 15,53  | 0,8393 | 7,00E-04 | 0,0407 |
| Defb1         | chr8:21776598-21795185    | WT | KI | 0,70   | 0,10   | 0,1482 | 0,00075  | 0,0425 |
| Gm44593       | chrX:110634585-110812324  | WT | KI | 0,96   | 0,48   | 0,4949 | 0,00075  | 0,0425 |
| Igf1          | chr4:45809467-45826923    | WT | KI | 1,87   | 1,28   | 0,6832 | 0,00075  | 0,0425 |
| Gdpd5         | chr7:99381413-99461877    | WT | KI | 8,82   | 6,97   | 0,7900 | 0,00075  | 0,0425 |
| Adarb1        | chr10:77290725-77418270   | WT | KI | 43,58  | 36,40  | 0,8353 | 0,00075  | 0,0425 |
| Ccdc40        | chr11:119228571-119265212 | WT | KI | 0,86   | 0,56   | 0,6560 | 8,00E-04 | 0,0447 |
| Hbb-bs        | chr7:103826533-103827928  | WT | KI | 242,12 | 194,01 | 0,8013 | 8,00E-04 | 0,0447 |
| Slc16a12      | chr19:34668402-34747289   | WT | KI | 0,45   | 0,71   | 1,5856 | 8,00E-04 | 0,0447 |
| Scube2        | chr7:109798675-109865679  | WT | KI | 0,74   | 0,47   | 0,6345 | 0,00085  | 0,0466 |
| Ppp1r32       | chr19:10474256-10482897   | WT | KI | 1,98   | 1,29   | 0,6487 | 0,00085  | 0,0466 |
| Rgs3          | chr4:62559846-62703018    | WT | KI | 7,15   | 5,51   | 0,7703 | 0,00085  | 0,0466 |
| Aspa          | chr11:73304991-73329596   | WT | KI | 13,84  | 10,82  | 0,7820 | 0,00085  | 0,0466 |
| Tmem125       | chr4:118540940-118543728  | WT | KI | 6,04   | 4,45   | 0,7372 | 9,00E-04 | 0,0484 |
| Fmo1          | chr1:162829560-162866610  | WT | KI | 7,69   | 5,71   | 0,7426 | 9,00E-04 | 0,0484 |
| Cacna2d2      | chr9:107399611-107529343  | WT | KI | 7,24   | 5,94   | 0,8203 | 9,00E-04 | 0,0484 |
| Erbin         | chr13:103818786-103920514 | WT | KI | 18,34  | 15,32  | 0,8353 | 9,00E-04 | 0,0484 |

**Supplementary Table-2.** 228 differentially expressed transcripts were downregulated in HMBS-deficient mice. Columns are as follows: Gene short-name, locus, sample 1+2, value 1+2 (mean reads RPKM), fold change, p-value, q-value

**Supplementary Table-3.**

| gene_short_name                       | locus                     | sample_1 | sample_2 | value_1 | value_2 | fold change | p_value  | q_value |
|---------------------------------------|---------------------------|----------|----------|---------|---------|-------------|----------|---------|
| Fosl2                                 | chr5:32135800-32157842    | WT       | KI       | 7,20    | 8,98    | 1,2478      | 5,00E-05 | 0,0042  |
| Arc                                   | chr15:74669082-74672570   | WT       | KI       | 63,04   | 79,48   | 1,2609      | 5,00E-05 | 0,0042  |
| Cbl                                   | chr9:44142975-44234049    | WT       | KI       | 7,80    | 10,25   | 1,3128      | 5,00E-05 | 0,0042  |
| Npy                                   | chr6:49822709-49829507    | WT       | KI       | 60,01   | 78,79   | 1,3130      | 5,00E-05 | 0,0042  |
| Sst                                   | chr16:23889580-23890844   | WT       | KI       | 273,95  | 361,66  | 1,3201      | 5,00E-05 | 0,0042  |
| Car12                                 | chr9:66713685-66766845    | WT       | KI       | 9,84    | 13,14   | 1,3360      | 5,00E-05 | 0,0042  |
| Slc31a1                               | chr4:62360726-62391769    | WT       | KI       | 5,50    | 7,36    | 1,3385      | 5,00E-05 | 0,0042  |
| Penk                                  | chr4:4133530-4188703      | WT       | KI       | 15,38   | 20,59   | 1,3388      | 5,00E-05 | 0,0042  |
| Kcnj2                                 | chr11:111066163-111076821 | WT       | KI       | 2,10    | 2,85    | 1,3597      | 5,00E-05 | 0,0042  |
| Col9a3                                | chr2:180597789-180642708  | WT       | KI       | 9,08    | 12,60   | 1,3874      | 5,00E-05 | 0,0042  |
| Sc5d                                  | chr9:42251594-42264256    | WT       | KI       | 14,77   | 20,80   | 1,4081      | 5,00E-05 | 0,0042  |
| Lars2                                 | chr9:123366926-123462664  | WT       | KI       | 10,51   | 14,84   | 1,4119      | 5,00E-05 | 0,0042  |
| Ctgf                                  | chr10:24595248-24598683   | WT       | KI       | 2,66    | 3,96    | 1,4907      | 5,00E-05 | 0,0042  |
| Frem1                                 | chr4:82897919-83052339    | WT       | KI       | 0,64    | 0,97    | 1,5306      | 5,00E-05 | 0,0042  |
| Col8a2                                | chr4:126286792-126314330  | WT       | KI       | 1,25    | 1,92    | 1,5396      | 5,00E-05 | 0,0042  |
| Cgn1                                  | chr9:71626508-71771602    | WT       | KI       | 2,33    | 3,76    | 1,6116      | 5,00E-05 | 0,0042  |
| Perp                                  | chr10:18845019-18857073   | WT       | KI       | 1,31    | 2,18    | 1,6610      | 5,00E-05 | 0,0042  |
| Lamc2                                 | chr1:153122755-153186447  | WT       | KI       | 0,35    | 0,59    | 1,6783      | 5,00E-05 | 0,0042  |
| Brd3,Mir7578                          | chr2:27445578-27475686    | WT       | KI       | 12,41   | 20,84   | 1,6790      | 5,00E-05 | 0,0042  |
| Pcolce                                | chr5:137605102-137611487  | WT       | KI       | 3,57    | 6,01    | 1,6841      | 5,00E-05 | 0,0042  |
| Drc7                                  | chr8:95055102-95078141    | WT       | KI       | 1,64    | 2,77    | 1,6864      | 5,00E-05 | 0,0042  |
| Gm44250                               | chr6:5216257-5220486      | WT       | KI       | 0,73    | 1,24    | 1,7071      | 5,00E-05 | 0,0042  |
| Lepr                                  | chr4:101717403-101815352  | WT       | KI       | 0,39    | 0,67    | 1,7080      | 5,00E-05 | 0,0042  |
| Ace                                   | chr11:105967944-105989964 | WT       | KI       | 4,50    | 8,02    | 1,7814      | 5,00E-05 | 0,0042  |
| Slc13a4                               | chr6:35267956-35308131    | WT       | KI       | 2,03    | 3,63    | 1,7865      | 5,00E-05 | 0,0042  |
| Slc37a2                               | chr9:37227584-37256149    | WT       | KI       | 0,62    | 1,13    | 1,8397      | 5,00E-05 | 0,0042  |
| Igfbp6                                | chr15:102144361-102149511 | WT       | KI       | 6,34    | 11,70   | 1,8461      | 5,00E-05 | 0,0042  |
| 1700063D05Rik                         | chr9:41192445-41217990    | WT       | KI       | 1,66    | 3,07    | 1,8479      | 5,00E-05 | 0,0042  |
| Enpp2                                 | chr15:54838897-54920146   | WT       | KI       | 110,67  | 206,85  | 1,8691      | 5,00E-05 | 0,0042  |
| Igfbp2                                | chr1:72824502-72852474    | WT       | KI       | 22,85   | 42,88   | 1,8769      | 5,00E-05 | 0,0042  |
| Kl                                    | chr5:150952606-150993817  | WT       | KI       | 7,19    | 13,53   | 1,8822      | 5,00E-05 | 0,0042  |
| Krt18                                 | chr15:102028215-102032026 | WT       | KI       | 1,00    | 1,90    | 1,9115      | 5,00E-05 | 0,0042  |
| Gm11549                               | chr3:36515056-36521813    | WT       | KI       | 0,81    | 1,64    | 2,0190      | 5,00E-05 | 0,0042  |
| Fmod                                  | chr1:134037253-134048277  | WT       | KI       | 0,99    | 2,01    | 2,0215      | 5,00E-05 | 0,0042  |
| RP24-175C20.18                        | chr9:44468476-44483803    | WT       | KI       | 3,65    | 7,55    | 2,0701      | 5,00E-05 | 0,0042  |
| Trpv4                                 | chr5:114622151-114658421  | WT       | KI       | 1,06    | 2,21    | 2,0805      | 5,00E-05 | 0,0042  |
| Sostdc1                               | chr12:36314168-36318452   | WT       | KI       | 3,14    | 6,57    | 2,0903      | 5,00E-05 | 0,0042  |
| Igf2                                  | chr7:142650765-142670356  | WT       | KI       | 12,35   | 26,56   | 2,1494      | 5,00E-05 | 0,0042  |
| Mir6904,Parp1                         | chr1:180568928-180601254  | WT       | KI       | 1069,91 | 2304,32 | 2,1538      | 5,00E-05 | 0,0042  |
| 77,Mir382,Mir410,Mir412,Akt1s1,Mir707 | chr12:109729763-109749460 | WT       | KI       | 16,03   | 35,08   | 2,1881      | 5,00E-05 | 0,0042  |
|                                       | chr7:44812255-44855421    | WT       | KI       | 43,52   | 95,53   | 2,1951      | 5,00E-05 | 0,0042  |
| Sulf1                                 | chr1:12692276-12861192    | WT       | KI       | 1,45    | 3,20    | 2,2055      | 5,00E-05 | 0,0042  |
| Cldn1                                 | chr16:26356641-26371841   | WT       | KI       | 0,58    | 1,31    | 2,2399      | 5,00E-05 | 0,0042  |
| Kctd12                                | chr14:102976580-102982637 | WT       | KI       | 10,35   | 23,30   | 2,2516      | 5,00E-05 | 0,0042  |
| Abca4                                 | chr3:122044442-122227370  | WT       | KI       | 0,75    | 1,71    | 2,2858      | 5,00E-05 | 0,0042  |
| Wdr86                                 | chr5:24711737-24730727    | WT       | KI       | 0,51    | 1,18    | 2,3075      | 5,00E-05 | 0,0042  |
| Clic6                                 | chr16:92498133-92541243   | WT       | KI       | 2,32    | 5,65    | 2,4309      | 5,00E-05 | 0,0042  |
| Agxt2,Gm21973,Prlr                    | chr15:10177654-10410153   | WT       | KI       | 0,62    | 1,60    | 2,5859      | 5,00E-05 | 0,0042  |
| 1500015010Rik                         | chr1:43730601-43743895    | WT       | KI       | 7,29    | 18,91   | 2,5928      | 5,00E-05 | 0,0042  |
| Slc4a5                                | chr6:83219827-83304945    | WT       | KI       | 0,76    | 2,13    | 2,8095      | 5,00E-05 | 0,0042  |
| Col8a1                                | chr16:57624257-57754737   | WT       | KI       | 0,44    | 1,26    | 2,8524      | 5,00E-05 | 0,0042  |
| Folr1                                 | chr7:101858330-101870788  | WT       | KI       | 3,40    | 10,23   | 3,0127      | 5,00E-05 | 0,0042  |
| F5                                    | chr1:164115263-164220277  | WT       | KI       | 0,69    | 2,10    | 3,0224      | 5,00E-05 | 0,0042  |
| Kcne2                                 | chr16:92292388-92298129   | WT       | KI       | 1,35    | 4,10    | 3,0429      | 5,00E-05 | 0,0042  |
| Aqp1                                  | chr6:55336431-55348555    | WT       | KI       | 1,08    | 3,41    | 3,1481      | 5,00E-05 | 0,0042  |
| Klhdc7a                               | chr4:139960219-139968026  | WT       | KI       | 2,26    | 7,54    | 3,3349      | 5,00E-05 | 0,0042  |
| Prr32                                 | chrX:45090903-45092791    | WT       | KI       | 0,69    | 2,33    | 3,3787      | 5,00E-05 | 0,0042  |
| Cldn2                                 | chrX:139800827-139811386  | WT       | KI       | 0,63    | 2,36    | 3,7288      | 5,00E-05 | 0,0042  |
| Steap1                                | chr5:5736316-5749326      | WT       | KI       | 0,43    | 1,61    | 3,7652      | 5,00E-05 | 0,0042  |
| Ttr                                   | chr18:20558073-20674324   | WT       | KI       | 318,33  | 1317,99 | 4,1403      | 5,00E-05 | 0,0042  |
| Mir1907,Trps1                         | chr15:50654751-50890041   | WT       | KI       | 4,80    | 24,07   | 5,0101      | 5,00E-05 | 0,0042  |
| Gm26325,Rnf225                        | chr7:12927415-12931072    | WT       | KI       | 0,39    | 2,93    | 7,5852      | 5,00E-05 | 0,0042  |
| Glce,Mir5133                          | chr9:62057247-62122610    | WT       | KI       | 6,98    | 73,73   | 10,5609     | 5,00E-05 | 0,0042  |
| Gm22137,Gm7541                        | chr16:8623162-8623720     | WT       | KI       | 0,27    | 8,43    | 31,5050     | 5,00E-05 | 0,0042  |
| Gm29718                               | chr1:136793033-136793510  | WT       | KI       | 0,77    | 0,00    | #NAME?      | 5,00E-05 | 0,0042  |

|                     |                           |    |    |        |        |         |          |        |
|---------------------|---------------------------|----|----|--------|--------|---------|----------|--------|
| Mir1946b            | chr9:21613443-21613576    | WT | KI | 9,82   | 0,00   | #NAME?  | 5,00E-05 | 0,0042 |
| Junb                | chr8:84976909-84978718    | WT | KI | 33,73  | 42,64  | 1,2641  | 1,00E-04 | 0,0079 |
| Cab39l              | chr14:59440980-59548903   | WT | KI | 8,84   | 11,37  | 1,2862  | 1,00E-04 | 0,0079 |
| Ldir                | chr9:21723482-21749919    | WT | KI | 4,84   | 6,27   | 1,2972  | 1,00E-04 | 0,0079 |
| Spint2              | chr7:29256340-29281912    | WT | KI | 12,78  | 17,76  | 1,3898  | 1,00E-04 | 0,0079 |
| Pttg1               | chr11:43420249-43426251   | WT | KI | 8,74   | 13,69  | 1,5663  | 1,00E-04 | 0,0079 |
| Bglap3              | chr3:88368615-88372743    | WT | KI | 0,28   | 0,71   | 2,5381  | 1,00E-04 | 0,0079 |
| Vip                 | chr10:5639217-5647617     | WT | KI | 10,01  | 13,37  | 1,3353  | 0,00015  | 0,0110 |
| AY036118            | chr17:39846957-39848827   | WT | KI | 135,46 | 168,87 | 1,2467  | 0,00025  | 0,0173 |
| Fap                 | chr2:62500942-62574075    | WT | KI | 0,25   | 0,51   | 2,0595  | 4,00E-04 | 0,0258 |
| Gm27762,St7         | chr6:17693936-17943025    | WT | KI | 12,78  | 16,47  | 1,2887  | 0,00045  | 0,0285 |
| RP24-329C11.8,Rnf26 | chr9:44066326-44121960    | WT | KI | 3,64   | 7,52   | 2,0639  | 0,00045  | 0,0285 |
| Pla2g5              | chr4:138799243-138863482  | WT | KI | 0,52   | 1,23   | 2,3710  | 0,00045  | 0,0285 |
| Col5a1              | chr2:27882924-28039514    | WT | KI | 1,68   | 2,18   | 1,3013  | 5,00E-04 | 0,0311 |
| Crhbp               | chr13:95431370-95444831   | WT | KI | 8,74   | 11,44  | 1,3090  | 5,00E-04 | 0,0311 |
| Nlrx1               | chr9:44252716-44268599    | WT | KI | 1,70   | 2,48   | 1,4581  | 5,00E-04 | 0,0311 |
| Crhr1               | chr11:104132854-104175523 | WT | KI | 4,26   | 5,71   | 1,3386  | 0,00065  | 0,0389 |
| Rprm                | chr2:54084092-54085552    | WT | KI | 16,98  | 21,58  | 1,2711  | 7,00E-04 | 0,0407 |
| Cd27,Mir8113        | chr6:125215550-125241249  | WT | KI | 0,07   | 0,99   | 14,4083 | 7,00E-04 | 0,0407 |
| Satb2               | chr1:56793980-57050084    | WT | KI | 2,45   | 3,25   | 1,3244  | 0,00075  | 0,0425 |
| Pon3                | chr6:5220851-5256286      | WT | KI | 0,84   | 1,37   | 1,6211  | 0,00075  | 0,0425 |
| RP24-175C20.19      | chr9:44468476-44483803    | WT | KI | 1,63   | 2,94   | 1,7976  | 0,00075  | 0,0425 |
| Fam180a             | chr6:35312667-35326141    | WT | KI | 0,19   | 0,42   | 2,2665  | 8,00E-04 | 0,0447 |
| Kcnh3               | chr15:99224975-99242817   | WT | KI | 27,25  | 32,61  | 1,1968  | 0,00085  | 0,0466 |
| Cckbr               | chr7:105425730-105470898  | WT | KI | 3,20   | 4,32   | 1,3494  | 0,00085  | 0,0466 |
| Lamp5               | chr2:136057926-136069917  | WT | KI | 12,32  | 15,28  | 1,2400  | 9,00E-04 | 0,0484 |
| Fzd4                | chr7:89404354-89413134    | WT | KI | 2,14   | 2,74   | 1,2847  | 9,00E-04 | 0,0484 |

**Supplementary Table-3.** 92 differentially expressed transcripts were upregulated in HMBS-deficient mice. Columns are as follows: Gene short-name, locus, sample 1+2, value 1+2 (mean reads RPKM), fold change, p-value, q-value
