# Supplementary material for: Severe hydroxymethylbilane synthase deficiency causes depression-like behavior and mitochondrial dysfunction in a mouse model of homozygous dominant acute intermittent porphyria
Source: PubMed Central journal article supplement (PMC7082933; doi:10.1186/s40478-020-00910-z), 2020-03-20
Supplement: 40478_2020_910_MOESM3_ESM.pdf [file 40478_2020_910_MOESM3_ESM.pdf]

**Supplementary Figure-1.**

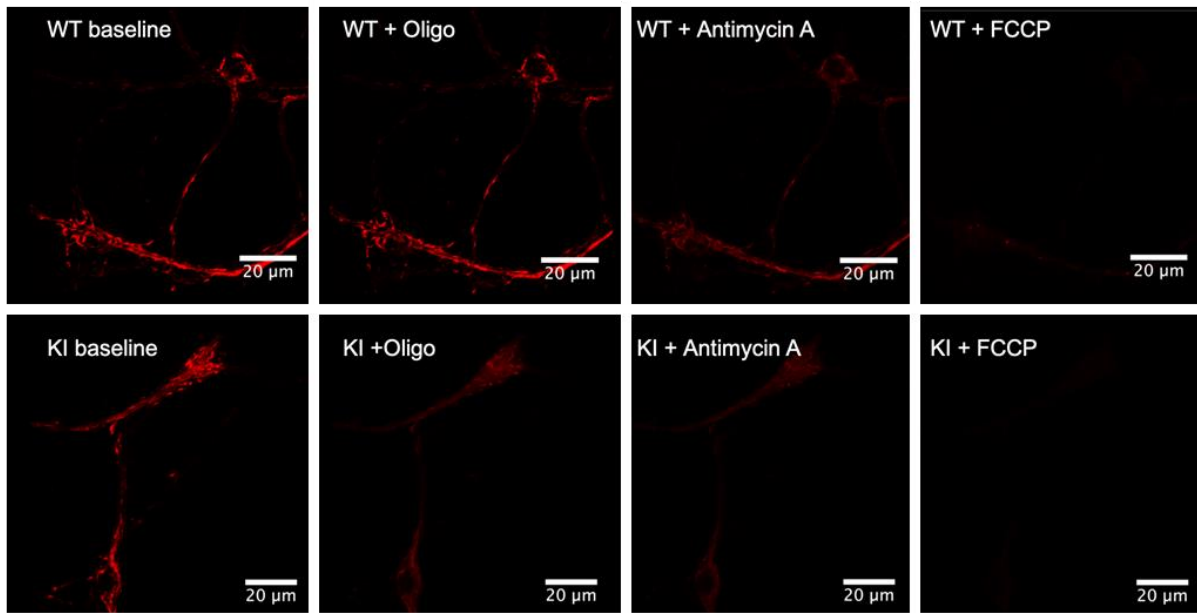

**Supplementary Figure-1.** Basal TMRM fluorescence in cultured hippocampal neurons and pharmacological intervention with ATP synthase inhibitor (Oligomycin), complex III inhibitor (Antimycin A) and protonophore FCCP in KI and WT mice; n=5-9 cells per genotype. TMRM, tetramethyl rhodamine ethyl ester, FCCP, carbonyl cyanide-4-(trifluoromethoxy)phenylhydrazone
